# Supplementary material for: Altering the redox status of Chlamydia trachomatis directly impacts its developmental cycle progression
Source: eLife. 2025 Jan 17;13:RP98409. doi: 10.7554/eLife.98409 (PMC11741522; doi:10.7554/eLife.98409)
Supplement: Figure 2—source data 1. [file elife-98409-fig2-data1.xlsx]

## Sheet: Sheet1
Figure 2 Source Data
	Fig 2A												Fig 2C
														Area
															ahpC 14-aTc	ahpC 14+aTc	EV 14-aTc	EV 14+aTc
			Rep 1	Rep 2	Rep 3		Efficiecy apply=A*(0.01*Efficiency)	A*(0.01*Efficiency)						1	178.364	262.901	168.033	117.793
	ahpC		Efficiency	Efficiency	Efficiency									2	154.959	389.744	157.992	176.595
			107.337	108.708	107.591		Efficiency apply	Rep 1	Rep 2	Rep 3				3	155.76	389.579	141.967	170.727
		14-aTc	0.00307268	0.00451275	0.00380636		14-aTc	0.00329812	0.00490572	0.0040953				4	81.884	490.421	123.182	137.884
		14+aTc	0.0438367	0.065615	0.0510966		14+aTc	0.047053	0.0713288	0.0549754				5	201.413	376.421	135.917	149.289
		24-aTc		0.0252265	0.0216911		24-aTc		0.0274232	0.0233377				6	146.157	352.248	178.926	110.86
		24+aTc	0.662517	0.977361	0.653607		24+aTc	0.711126	1.06247	0.703222				7	110.455	258.736	197.19	115.331
														8	206.339	394.545	150.364	170.405
		cDNA/gDNA	Rep1	Rep2	Rep3	Average	STDev							9	128.174	316.157	158.43	129.62
		14-aTc	0.155571	0.185005	0.201616	0.180731	0.0233179							10	158.463	191.992	128.157	125.86
		14+aTc	1.44404	2.39101	2.31686	2.05063	0.526633							11	109.736	370.405	146.612	103.025
		24-aTc		0.0420855	0.0435841	0.0285583	0.0247389							12	178.686	349.19	129.579	172.405
		24+aTc	0.477285	0.651928	0.39177	0.506994	0.132599							13	159.248	424.124	170.116	124.521
														14	144.471	532.843	105.793	145.793
	EV													15	103.471	327.835	107.248	153.57
			Rep1	Rep2	Rep3									16	195.504	385.19	121.95	124.86
			Efficiency	Efficiency	Efficiency									17	181.595	369.455	116.264	134.686
			107.337	108.708	107.591		Efficiency apply	Rep 1	Rep 2	Rep 3				18	166.083	448.595	148.835	159.124
		14-aTc	0.00654569	0.00919398	0.00675086		14-aTc	0.00702595	0.00999459	0.00726331				19	138.025	117.579	178.884	107.331
		14+aTc	0.00495495	0.00800013	0.00592854		14+aTc	0.0053185	0.00869678	0.00637858				20	241.041	345.099	159.124	94.463
		24-aTc	0.0149899	0.0231939	0.0153992		24-aTc	0.0160897	0.0252137	0.0165681				21	138.496	350.579	149.306	185.43
		24+aTc	0.0160475	0.0257223	0.0162408		24+aTc	0.0172249	0.0279622	0.0174737				22	138.893	496.446	138.446	83.083
														23	139.231	349.174	91.099	169.595
		cDNA/gDNA	Rep1	Rep2	Rep3	Average	STDev							24	196.339	443.413	183.198	177.446
		14-aTc	0.183475	0.303407	0.258353	0.248412	0.0605809							25	136.496	395.992	161.165	105.496
		14+aTc	0.162187	0.306163	0.190639	0.219663	0.0762504							26	225.669	470.636	128.587	182.314
		24-aTc	0.0232904	0.034221	0.028396	0.0286358	0.00546921							27	173.314	335.504	160.843	110.058
		24+aTc	0.0227226	0.0334227	0.0296662	0.0286039	0.00542857							28	112.083	484.628	195.901	120.372
														29	92.942	188.455	155.446	175.57
														30	149.248	375.372	89.074	173.19
	Fig 2D													31	179.107	308.207	103.587	175.446
	ahpC	Rep 1	Rep 2	Rep 3	Efficiency									32	209.281	432.818	198.562	226.529
	14-aTc	0.0259448	0.0324515	0.0248585	81.7118									33	159.876	380.876	156.851	201.149
	14+aTc	0.039877	0.0365089	0.0290391										34	181.909	289.041	216.603	169.983
	24-aTc	0.785309	0.797443	0.655306										35	133.14	405.934	182.785	165.76
	24+aTc	1.8234	1.99449	2.19672										36	165.876	352.174	156.14	192.107
														37	145.736	397.909	147.967	164.107
	Efficiency apply													38	158.785	351.165	199.587	205.917
		Rep1	Rep2	Rep3	Average	STDev								39	216.76	361.198	197.281	180.116
	14-aTc	0.0212001	0.0265167	0.0203124	0.0226764	0.00335531								40	136.099	184	127.017	130.802
	14+aTc	0.0325843	0.0298321	0.0237284	0.028715	0.00453239								41	173.893	355.909	210.769	205.678
	24-aTc	0.641692	0.651607	0.535464	0.609587	0.0643841								42	161.504	387.091	151.405	177.694
	24+aTc	1.48994	1.62974	1.79499	1.63822	0.1527								43	121.983	398.512	198.86	143.917
														44	186.413	349.107	157.595	129.273
	EV	Rep1	Rep2	Rep3	Efficiency									45	155.364	333.628	226.223	119.124
	14-aTc	0.0398901	0.0345538	0.0407009	82.2074									46	208.355	297.215	184	183.612
	14+aTc	0.0465821	0.040071	0.034199										47	177.901	347.702	138.479	185.347
	24-aTc	0.840354	0.896262	0.709752										48	178.008	382.405	225.165	223.653
	24+aTc	0.922125	1.0177	0.716494										49	198.397	497.198	196.446	176.446
														50	221.686	407.975	186.669	208.57
		Rep1	Rep2	Rep3	Average	STDev
	14-aTc	0.0382938	0.0329412	0.028114	0.0331163	0.00509216								Fig 2F
	14+aTc	0.0327924	0.0284057	0.033459	0.0315524	0.00274541									ahpC
	24-aTc	0.69083	0.73679	0.583465	0.670362	0.0786851									IFU/ml (log10)	Rep 1	Rep 2	Rep 3		IFU/ml(log10)/gDNA	Rep 1	Rep 2	Rep 3	Average	STDev
	24+aTc	0.758051	0.836625	0.589008	0.727895	0.126533									ahpC-aTc	7.35261	7.93818	7.69768		ahpC-aTc	11.4582	12.1825	14.3757	12.6721	1.51916
															ahpC+aTc	7.00291	7.49909	7.28034		ahpC+aTc	4.70013	4.60142	4.05593	4.45249	0.34696
	Fig 2E
		24 hpi							48 hpi						IFU/ml (log10)	Rep 1	Rep 2	Rep 3		IFU/ml(log10)/gDNA	Rep 1	Rep 2	Rep 3	Average	STDev
	IFU/ml	Rep 1	Rep 2	Rep 3				IFU/ml	Rep 1	Rep 2	Rep 3				EV-aTc	6.7859	6.90548			EV-aTc	9.82283	11.8353		10.8291	1.42302
	ahpC-aTc	2.25221e+07	8.67328e+07	49852000				ahpC-aTc	604032000	2632960000	1413280000				EV+aTc	6.77049	6.88515			EV+aTc	8.93145	11.6894		10.3104	1.95016
	ahpC+aTc	10067200	3.15568e+07	19069600				ahpC+aTc	5.06372e+08	1.77144e+09	9.8736e+08
		24 hpi							48 hpi							ahpC	EV
	Percentage	Rep 1	Rep 2	Rep 3	Average	STDev		Percentage	Rep 1	Rep 2	Rep 3	Average	STDev		uni	12.6721	10.8291	1.51916	1.42302
	ahpC-aTc	100	100	100	100	0		ahpC-aTc	100	100	100	100	0		ind	4.45249	10.3104	0.34696	1.95016
	ahpC+aTc		38.3839	38.2524	38.3182	0.0929855		ahpC+aTc	83.8319	67.2794	69.863	73.6581	8.90496
		IFU/ml	24 hpi						48 hpi
		Rep 1	Rep 2	Rep 3					Rep 1	Rep 2	Rep 3
	EV-aTc	6108080	3.18472e+07	8.04408e+06				EV-aTc	153912000	8.9056e+08	227480000
	EV+aTc	5895120	3.03952e+07	7.67624e+06				EV+aTc	144232000	8.4216e+08	2.11992e+08
		Percentage	24 hpi						48 hpi
		Rep 1	Rep 2	Rep 3	Average	STDev		48 hrs	Rep 1	Rep 2	Rep 3	Average	STDev
	EV-aTc	100		100	100	0		EV-aTc	100		100	100	0
	EV+aTc	96.5135		95.4272	95.9703	0.768112		EV+aTc	93.7107		93.1915	93.4511	0.367132
