# Supplementary material for: Altering the redox status of Chlamydia trachomatis directly impacts its developmental cycle progression
Source: eLife. 2025 Jan 17;13:RP98409. doi: 10.7554/eLife.98409 (PMC11741522; doi:10.7554/eLife.98409)
Supplement: Figure 3—figure supplement 1—source data 1. [file elife-98409-fig3-figsupp1-data1.xlsx]

## Sheet: Sheet1
Supplementary Figure 1 Source Data
	Fig S1A
	Uninfected HeLa	Rep 1	Rep 2	Rep 3				Inf with EV	Rep 1	Rep 2	Rep 3				Fig S1C
	Uninf/Untr	38044	37849	38749				Inf with EV/Untr	36273	35346.3	36293.8				Uninfected HeLa	Rep 1	Rep 2	Rep 3			Inf with EV	Rep 1	Rep 2	Rep 3
	Uninf/H2O2 (100uM)	38575.7	38379.3	38531.9				Inf/H2O2 (100uM)	36741.3	35752	36342.8				Untreated	21465.3	22372.3	21391.3			Untreated	21576	21296.2	24699.7
	Uninf/H2O2 (200uM)	39078	38782	39535.6				Inf/H2O2 (200uM)	37398.3	36422	36921.5				Tert-butyl hydroperoxide (100uM)	22745.7	23084.3	21986.3			Tert-butyl hydroperoxide (100uM)	22069.3	23091.2	26535.7
	Uninf/H2O2 (500uM)	38665.7	38591.7	39753.5				Inf/H2O2 (500uM)	37024.7	36087	37041.4				Tert-butyl hydroperoxide (200uM)	21764.3	21357	21657.3			Tert-butyl hydroperoxide (200uM)	20661	19731.2	24018.7
	Uninf/H2O2 (1000uM)	38871.3	38701	39082.5				Inf/H2O2 (1000uM)	36592	35750.7	36293.9				Tert-butyl hydroperoxide (500uM)	22281.3	21940.7	19826.7			Tert-butyl hydroperoxide (500uM)	22024.7	22549.8	24618.3
		Rep 1	Rep 2	Rep 3	Average	STDev			Rep 1	Rep 2	Rep 3	Average	STDev		Tert-butyl hydroperoxide (1 mM)	19936	20225	19595			Tert-butyl hydroperoxide (1 mM)	21567.3	20141.8	21848.3
	Uninf/Untr	100	100	100	100	0		Inf/Untr	100	100	100	100	0		Tert-butyl hydroperoxide (2 mM)	20793.2	21001	20156.3			Tert-butyl hydroperoxide (2 mM)	22490.3	22411.5	24143.3
	Uninf/H2O2 (100uM)	101.398	101.401	100.737	101.179	0.382435		Inf/H2O2 (100uM)	101.291	101.148	100.855	101.098	0.222112		Tert-butyl hydroperoxide (5 mM)	15862.3	16798.7	14894.3			Tert-butyl hydroperoxide (5 mM)	24984.3	22310.5	22842
	Uninf/H2O2 (200uM)	102.718	102.465	102.402	102.528	0.167204		Inf/H2O2 (200uM)	103.102	103.043	102.621	102.922	0.262376			Rep 1	Rep 2	Rep 3	Average	STDev		Rep 1	Rep 2	Rep 3	Average	STDev
	Uninf/H2O2 (500uM)	101.634	101.962	102.066	101.888	0.225588		Inf/H2O2 (500uM)	102.072	102.095	102.076	102.081	0.0125415		Untreated	100	100	100	100	0	Untreated	100	100	100	100	0
	Uninf/H2O2 (1000uM)	102.175	102.251	101.756	102.06	0.266668		Inf/H2O2 (1000uM)	100.879	101.144	100.67	100.898	0.237309		Tert-butyl hydroperoxide (100uM)	105.965	103.183	102.782	103.976	1.73367	Tert-butyl hydroperoxide (100uM)	102.286	108.429	107.433	106.05	3.29666
															Tert-butyl hydroperoxide (200uM)	101.393	95.4617	101.243	99.366	3.38211	Tert-butyl hydroperoxide (200uM)	95.7592	92.6513	97.2429	95.2178	2.3432
															Tert-butyl hydroperoxide (500uM)	103.801	98.0705	92.6855	98.1858	5.55888	Tert-butyl hydroperoxide (500uM)	102.079	105.887	99.6707	102.546	3.13417
															Tert-butyl hydroperoxide (1 mM)	92.8753	90.4018	91.6025	91.6266	1.23692	Tert-butyl hydroperoxide (1 mM)	99.9598	94.5796	88.456	94.3318	5.75593
															Tert-butyl hydroperoxide (2 mM)	96.8686	93.8704	94.2266	94.9885	1.63788	Tert-butyl hydroperoxide (2 mM)	104.238	105.237	97.7476	102.408	4.06644
	Fig S1B														Tert-butyl hydroperoxide (5 mM)	73.8974	75.0868	69.6279	72.8707	2.87064	Tert-butyl hydroperoxide (5 mM)	115.797	104.763	92.479	104.346	11.6645
	Uninfected HeLa	Rep 1	Rep 2	Rep 3			HeLa infected with EV	Rep 1	Rep 2	Rep 3					Fig S1D
	Untreated	21465.3	22372.3	21391.3			Untreated	21576	21296.2	24699.7					Uninfected HeLa	Rep 1	Rep 2	Rep 3			Inf with EV	Rep 1	Rep 2	Rep 3
	Cumene hydroperoxide (100uM)	23750	23823.3	22712			Cumene hydroperoxide (100uM)	21974	22508.2	25811					Untreated	21465.3	22372.3	21391.3			Untreated	21576	21296.2	24699.7
	Cumene hydroperoxide (200uM)	22885.7	22484.7	20691.7			Cumene hydroperoxide (200uM)	22837.7	22192.2	24617.3					Peroxynitrite (100uM)	23966.3	21782.7	21271.7			Peroxynitrite (100uM)	24147	22504.2	25390.7
	Cumene hydroperoxide (500uM)	23296.7	22987.7	20039.7			Cumene hydroperoxide (500uM)	21520.7	22457.5	23983.3					Peroxynitrite (200uM)	22750.7	20983.7	20650.7			Peroxynitrite (200uM)	23440	22126.5	24376.7
	Cumene hydroperoxide (1 mM)	19820.3	21044.3	19968.7			Cumene hydroperoxide (1 mM)	22197.3	21354.5	23702.7					Peroxynitrite (500uM)	22752.3	21343.3	20872			Peroxynitrite (500uM)	22632.7	23063.5	24456.7
	Cumene hydroperoxide (2 mM)	18612.3	20416	19087.3			Cumene hydroperoxide (2 mM)	23392.3	23650.8	24136.7					Peroxynitrite (1 mM)	20820.3	20845	19367.7			Peroxynitrite (1 mM)	22354.7	20776.5	24814.7
	Cumene hydroperoxide (5 mM)	17727	19065	14594.7			Cumene hydroperoxide (5 mM)	20746	15699.5	22361					Peroxynitrite (2 mM)	18202	14768	17678.7			Peroxynitrite (2 mM)	20781	17651.5	18051.7
															Peroxynitrite (5 mM)	259.667	214	638.333			Peroxynitrite (5 mM)	151	539.833	238.333
																Rep 1	Rep 2	Rep 3	Uninfected HeLa	STDev		Rep 1	Rep 2	Rep 3	HeLa infected with EV	STDev
	Untreated	100	100	100	100	0	Untreated	100	100	100	100	0			Untreated	100	100	100	100	0	Untreated	100	100	100	100	0
	Cumene hydroperoxide (100uM)	110.644	106.486	106.174	107.768	2.49542	Cumene hydroperoxide (100uM)	101.845	105.691	104.499	104.012	1.96908			Peroxynitrite (100uM)	111.651	97.3643	99.4406	102.819	7.71938	Peroxynitrite (100uM)	111.916	105.672	102.798	106.795	4.66177
	Cumene hydroperoxide (200uM)	106.617	100.502	96.7292	101.283	4.98984	Cumene hydroperoxide (200uM)	105.848	104.207	99.6667	103.241	3.20186			Peroxynitrite (200uM)	105.988	93.7929	96.5375	98.7728	6.39742	Peroxynitrite (200uM)	108.639	103.899	98.6923	103.743	4.97529
	Cumene hydroperoxide (500uM)	108.532	102.75	93.6812	101.654	7.48559	Cumene hydroperoxide (500uM)	99.7435	105.453	97.0998	100.766	4.26946			Peroxynitrite (500uM)	105.996	95.4006	97.5722	99.6562	5.59655	Peroxynitrite (500uM)	104.897	108.299	99.0162	104.071	4.69621
	Cumene hydroperoxide (1 mM)	92.3365	94.0641	93.3493	93.25	0.868084	Cumene hydroperoxide (1 mM)	102.88	100.274	95.9635	99.7057	3.49295			Peroxynitrite (1 mM)	96.9952	93.1731	90.5398	93.5694	3.24588	Peroxynitrite (1 mM)	103.609	97.5598	100.466	100.545	3.02535
	Cumene hydroperoxide (2 mM)	86.7088	91.2556	89.2293	89.0646	2.27786	Cumene hydroperoxide (2 mM)	108.418	111.057	97.7206	105.732	7.06228			Peroxynitrite (2 mM)	84.7972	66.0101	82.6441	77.8171	10.2817	Peroxynitrite (2 mM)	96.3154	82.8858	73.0847	84.0953	11.6625
	Cumene hydroperoxide (5 mM)	82.5843	85.2169	68.227	78.6761	9.14438	Cumene hydroperoxide (5 mM)	96.1531	73.7198	90.5316	86.8015	11.6725			Peroxynitrite (5 mM)	1.2097	0.956539	2.98407	1.71677	1.10479	Peroxynitrite (5 mM)	0.699852	2.53488	0.964925	1.39989	0.991832
