# Supplementary material for: Altering the redox status of Chlamydia trachomatis directly impacts its developmental cycle progression
Source: eLife. 2025 Jan 17;13:RP98409. doi: 10.7554/eLife.98409 (PMC11741522; doi:10.7554/eLife.98409)
Supplement: Figure 3—figure supplement 2—source data 1. [file elife-98409-fig3-figsupp2-data1.xlsx]

## Sheet: Sheet1
Supplementary Figure 2 Source Data
	Fig S2B
		Rep 1	Rep 2	Rep 3
		IFU/ml	IFU/ml	IFU/ml
	Untreated	5.34336e+07	78988800	1.64237e+08
	CHP (62.5 uM)	5.12395e+07	7.23741e+07	1.61011e+08
	H2O2 (62.5 uM)	53724000	77343200	1.65205e+08
	TBHP (62.5 uM)	5.47243e+07	7.87307e+07	1.71013e+08
	CHP (250 uM)	2.80075e+07	4.12045e+07	8.52485e+07
	H2O2 (500 uM)	2.77493e+07	3.76229e+07	8.52485e+07
	TBHP (250 uM)	2.68781e+07	4.03656e+07	8.85075e+07
	CHP (1 mM)	119064	327829	1.52944e+06
	H2O2 (1 mM)	455928	638880	1.39069e+06
	TBHP (1 mM)	1.69077e+06	3.90749e+06	3.37187e+06
	PN (1 mM)	1.41005e+07	2.93949e+07	5.03683e+07
		Rep 1	Rep 2	Rep 3
		Percentage	Percentage	Percentage	Percentage	STDev
	Untreated	100	100	100	100	0
	CHP (62.5 uM)	95.8937	91.6258	98.0354	95.185	3.26302
	H2O2 (62.5 uM)	100.543	97.9167	100.589	99.6832	1.53002
	TBHP (62.5 uM)	102.415	99.6732	104.126	102.071	2.24611
	CHP (250 uM)	52.4155	52.165	51.9057	52.1621	0.254894
	H2O2 (500 uM)	51.9324	47.6307	51.9057	50.4896	2.47589
	TBHP (250 uM)	50.3019	51.1029	53.89	51.765	1.88341
	CHP (1 mM)	0.222826	0.415033	0.931238	0.523032	0.366346
	H2O2 (1 mM)	0.853261	0.808824	0.846758	0.836281	0.024
	TBHP (1 mM)	3.16425	4.9469	2.05305	3.38806	1.45985
	PN (1 mM)	26.3889	37.2141	30.668	31.4236	5.452
