# Supplementary material for: Altering the redox status of Chlamydia trachomatis directly impacts its developmental cycle progression
Source: eLife. 2025 Jan 17;13:RP98409. doi: 10.7554/eLife.98409 (PMC11741522; doi:10.7554/eLife.98409)
Supplement: Figure 3—source data 1. [file elife-98409-fig3-data1.xlsx]

## Sheet: Sheet1
Figure 3 Source Data
	Fig 3B													Fig 3D
	Rep 1				Rep 2				Rep 3					Rep 1				Rep 2					Rep 3
		ahpC-aTc	ahpC+aTc			ahpC-aTc	ahpC+aTc			ahpC-aTc	ahpC+aTc				EV-aTc	EV+aTc			EV-aTc	EV+aTc			EV-aTc	EV+aTc
	Untreated	6.90829e+07	55756800		Untreated	9.71227e+07	6.90507e+07		Untreated	111416800	7.67301e+07			Untreated	4.15595e+07	3.54933e+07		Untreated	7.33099e+07	69792800		Untreated	6.16939e+07	6.30813e+07
	CHP (62.5 μM)	6.79859e+07	5.55309e+07		CHP (62.5 μM)	87894400	7.11157e+07		CHP (62.5 μM)	100865600	7.65365e+07			CHP (62.5 μM)	4.05269e+07	34170400		CHP (62.5 μM)	7.29227e+07	67566400		CHP (62.5 μM)	6.02419e+07	58660800
	H2O2 (62.5 μM)	66792000	5.48533e+07		H2O2 (62.5 μM)	8.98949e+07	6.76309e+07		H2O2 (62.5 μM)	100091200	7.19869e+07			H2O2 (62.5 μM)	41333600	3.59451e+07		H2O2 (62.5 μM)	7.17611e+07	7.16965e+07		H2O2 (62.5 μM)	6.13389e+07	60112800
	TBHP (62.5 μM)	68050400	55563200		TBHP (62.5 μM)	9.26053e+07	7.00187e+07		TBHP (62.5 μM)	1.05254e+08	7.28259e+07			TBHP (62.5 μM)	4.04947e+07	34170400		TBHP (62.5 μM)	6.98573e+07	7.04381e+07		TBHP (62.5 μM)	6.02419e+07	61274400
	CHP (250 μM)	3.34283e+07	53143200		CHP (250 μM)	4.61736e+07	6.95347e+07		CHP (250 μM)	53724000	70760800			CHP (250 μM)	2.06507e+07	1.82629e+07		CHP (250 μM)	3.94944e+07	3.59773e+07		CHP (250 μM)	3.21053e+07	3.15245e+07
	H2O2 (500 μM)	34460800	5.40789e+07		H2O2 (500 μM)	4.56573e+07	7.27613e+07		H2O2 (500 μM)	57112000	7.00187e+07			H2O2 (500 μM)	2.15541e+07	20521600		H2O2 (500 μM)	3.92363e+07	3.56547e+07		H2O2 (500 μM)	2.98467e+07	3.15245e+07
	TBHP (250 μM)	3.52997e+07	5.56277e+07		TBHP (250 μM)	47432000	69986400		TBHP (250 μM)	55466400	6.90829e+07			TBHP (250 μM)	2.03603e+07	1.97795e+07		TBHP (250 μM)	3.70421e+07	36880800		TBHP (250 μM)	3.10083e+07	3.13309e+07
	CHP (1 mM)	656627	6737280		CHP (1 mM)	794083	9.12179e+06		CHP (1 mM)	964128	1.04125e+07			CHP (1 mM)	317181	322344		CHP (1 mM)	471093	413336		CHP (1 mM)	762784	627909
	H2O2 (1 mM)	660821	8.59261e+06		H2O2 (1 mM)	859907	9.01853e+06		H2O2 (1 mM)	1.01898e+06	10435040			H2O2 (1 mM)	424952	317504		H2O2 (1 mM)	6.56304e+06	475611		H2O2 (1 mM)	7.38261e+06	635653
	TBHP (1 mM)	657917	9.04435e+06		TBHP (1 mM)	911856	9.08629e+06		TBHP (1 mM)	1045440	1.06415e+07			TBHP (1 mM)	1.37133e+06	516589		TBHP (1 mM)	8924960	1.50685e+06		TBHP (1 mM)	1.98763e+06	2.13605e+06
	PN (1 mM)	18682400	4.39795e+07		PN (1 mM)	2.27157e+07	6.11131e+07		PN (1 mM)	3.37509e+07	63888000			PN (1 mM)	1.34229e+07	14616800		PN (1 mM)	2.89109e+07	2.59747e+07		PN (1 mM)	2.56843e+07	23619200
	Rep 1				Rep 2				Rep 3					Rep 1					Rep 2			Rep 3
		ahpC-aTc	ahpC+aTc			ahpC-aTc	ahpC+aTc			ahpC-aTc	ahpC+aTc				EV-aTc	EV+aTc			EV-aTc	EV+aTc			EV-aTc	EV+aTc
	Untreated	100	100		Untreated	100	100		Untreated	100	100			Untreated	100	100		Untreated	100	100		Untreated	100	100
	CHP (62.5 μM)	98.412	99.5949		CHP (62.5 μM)	90.4983	102.991		CHP (62.5 μM)	90.53	99.7477			CHP (62.5 μM)	97.5155	96.2727		CHP (62.5 μM)	99.4718	96.81		CHP (62.5 μM)	92.9923	97.6464
	H2O2 (62.5 μM)	96.6838	98.3796		H2O2 (62.5 μM)	92.5581	97.9439		H2O2 (62.5 μM)	89.8349	93.8183			H2O2 (62.5 μM)	99.4565	101.273		H2O2 (62.5 μM)	97.8873	102.728		H2O2 (62.5 μM)	95.2941	99.4247
	TBHP (62.5 μM)	98.5054	99.6528		TBHP (62.5 μM)	95.3488	101.402		TBHP (62.5 μM)	94.4686	94.9117			TBHP (62.5 μM)	97.4379	96.2727		TBHP (62.5 μM)	95.2905	100.925		TBHP (62.5 μM)	97.1355	97.6464
	CHP (250 μM)	48.3886	95.3125		CHP (250 μM)	47.5415	100.701		CHP (250 μM)	48.2189	92.2204			CHP (250 μM)	49.6894	51.4545		CHP (250 μM)	53.8732	51.5488		CHP (250 μM)	49.9744	52.0397
	H2O2 (500 μM)	49.8832	96.9907		H2O2 (500 μM)	47.01	105.374		H2O2 (500 μM)	51.2598	91.2532			H2O2 (500 μM)	51.8634	57.8182		H2O2 (500 μM)	53.5211	51.0865		H2O2 (500 μM)	49.9744	48.3787
	TBHP (250 μM)	51.0976	99.7685		TBHP (250 μM)	48.8372	101.355		TBHP (250 μM)	49.7828	90.0336			TBHP (250 μM)	48.9907	55.7273		TBHP (250 μM)	50.5282	52.8433		TBHP (250 μM)	49.6675	50.2615
	CHP (1 mM)	0.95049	12.0833		CHP (1 mM)	0.817608	13.2103		CHP (1 mM)	0.865334	13.5702			CHP (1 mM)	0.763199	0.908182		CHP (1 mM)	0.642606	0.592233		CHP (1 mM)	0.995396	1.2364
	H2O2 (1 mM)	0.956562	15.4109		H2O2 (1 mM)	0.885382	13.0607		H2O2 (1 mM)	0.914567	13.5997			H2O2 (1 mM)	1.02252	0.894545		H2O2 (1 mM)	8.95246	0.681461		H2O2 (1 mM)	1.00767	11.9665
	TBHP (1 mM)	0.952359	16.2211		TBHP (1 mM)	0.93887	13.1589		TBHP (1 mM)	0.938315	13.8688			TBHP (1 mM)	3.29969	1.45545		TBHP (1 mM)	12.1743	2.15904		TBHP (1 mM)	3.38619	3.22176
	PN (1 mM)	27.0434	78.8773		PN (1 mM)	23.3887	88.5047		PN (1 mM)	30.2925	83.2632			PN (1 mM)	32.2981	41.1818		PN (1 mM)	39.4366	37.2168		PN (1 mM)	37.4425	41.6318
		ahpC-aTc	ahpC+aTc	STDev	STDev										EV-aTc	EV+aTc	STDev	STDev
	Untreated	100	100	0	0									Untreated	100	100	0	0
	CHP (62.5 μM)	93.1468	100.778	4.55982	1.91795									CHP (62.5 μM)	98.2113	95.3583	1.09364	2.06657
	H2O2 (62.5 μM)	93.0256	96.714	3.44828	2.51713									H2O2 (62.5 μM)	98.9228	99.7648	0.896928	3.93952
	TBHP (62.5 μM)	96.1076	98.6554	2.12267	3.35807									TBHP (62.5 μM)	96.7916	98.111	1.30418	2.4746
	CHP (250 μM)	48.0497	96.0779	0.448183	4.29179									CHP (250 μM)	51.8675	50.9926	2.09721	0.883008
	H2O2 (500 μM)	49.3843	97.8726	2.16839	7.10152									H2O2 (500 μM)	51.2544	52.9597	2.62476	4.24416
	TBHP (250 μM)	49.9059	97.0524	1.13522	6.13									TBHP (250 μM)	49.9268	52.746	0.82158	3.03105
	CHP (1 mM)	0.877811	12.9546	0.0673141	0.775717									CHP (1 mM)	0.880735	0.831937	0.313862	0.212121
	H2O2 (1 mM)	0.918837	14.0238	0.0357818	1.23113									H2O2 (1 mM)	7.31384	0.861226	5.65302	0.165639
	TBHP (1 mM)	0.943181	14.4162	0.0079528	1.60282									TBHP (1 mM)	6.23191	2.33356	5.1464	0.977127
	PN (1 mM)	26.9082	83.5484	3.45388	4.82001									PN (1 mM)	37.7889	38.6137	4.88013	2.22691
