# Supplementary material for: Altering the redox status of Chlamydia trachomatis directly impacts its developmental cycle progression
Source: eLife. 2025 Jan 17;13:RP98409. doi: 10.7554/eLife.98409 (PMC11741522; doi:10.7554/eLife.98409)
Supplement: Figure 4—source data 1. [file elife-98409-fig4-data1.xlsx]

## Sheet: Sheet1
Figure 4 Source Data
	Fig 4A											Fig 4C
		Efficiency	Efficiency	Efficiency										Efficiency
		107.337	108.708	107.591										107.977
		Rep 1	Rep 2	Rep 3	Efficiency apply	Rep 1	Rep 2	Rep 3					Rep 1	Rep 2	Rep 3
	ahpC KD14-aTc	0.0016376	0.002036	0.00158089	ahpC KD14-aTc	0.00175775	0.00221329	0.0017009				ahpC KD14-aTc	0.0112825	0.0130036	0.0125028
	ahpC KD14+aTc	0.000646823	0.000825101	0.000673876	ahpC KD14+aTc	0.00069428	0.000896951	0.00072503				ahpC KD14+aTc	0.0433303	0.048925	0.0593995
	ahpC KD24-aTc	0.0286081	0.0391481	0.0354434	ahpC KD24-aTc	0.0307071	0.0425571	0.0381339				ahpC KD24-aTc	1.43979	1.29342	1.62738
	ahpC KD24+aTc	0.000734904	0.000924679	0.000724083	ahpC KD24+aTc	0.000788823	0.0010052	0.000779048				ahpC KD24+aTc	0.130073	0.137942	0.165381
	cDNA/gDNA	Rep1	Rep2	Rep3	Average	STDev
	ahpC KD14-aTc	0.144285	0.157632	0.125991	0.142636	0.0158848						Efficiency apply	Rep 1	Rep 2	Rep 3	Average	STDev
	ahpC KD14+aTc	0.0148392	0.0169788	0.0113043	0.0143741	0.00286571						ahpC KD14-aTc	0.0121825	0.0140409	0.0135001	0.0132412	0.000955854
	ahpC KD24-aTc	0.0197519	0.030472	0.0217015	0.0239752	0.00571028						ahpC KD14+aTc	0.0467868	0.0528278	0.0641378	0.0545841	0.00880782
	ahpC KD24+aTc	0.00561645	0.00674879	0.00436262	0.00557596	0.0011936						ahpC KD24-aTc	1.55464	1.3966	1.7572	1.56948	0.180758
												ahpC KD24+aTc	0.140449	0.148945	0.178573	0.155989	0.0200145
		Efficiency	Efficiency	Efficiency
		107.337	108.708	107.591	Efficiency apply								Efficiency
		Rep 1	Rep 2	Rep 3		Rep 1	Rep 2	Rep 3					82.2074
	NT14-aTc	0.00667476	0.00396586	0.00723715	NT14-aTc	0.00716448	0.00431121	0.00778652					Rep 1	Rep 2	Rep 3
	NT14+aTc	0.00408566	0.00657124	0.0044219	NT14+aTc	0.00438542	0.00714347	0.00475756				NT14-aTc	0.0395066	0.0460703	0.0409615
	NT24-aTc	0.0155366	0.0112304	0.0145054	NT24-aTc	0.0166765	0.0122083	0.0156065				NT14+aTc	0.0334569	0.0421503	0.0360435
	NT24+aTc	0.0117691	0.00763666	0.0123211	NT24+aTc	0.0126326	0.00830166	0.0132564				NT24-aTc	0.932465	0.945373	1.02107
												NT24+aTc	0.828882	0.805991	1.04309
	cDNA/gDNA	Rep1	Rep2	Rep3	Average	STDev
	NT14-aTc	0.220601	0.113833	0.231237	0.188557	0.064931						Efficiency apply
	NT14+aTc	0.159447	0.206158	0.160564	0.17539	0.0266516							Rep1	Rep2	Rep3	Average	STDev
	NT24-aTc	0.0217552	0.0157089	0.0185926	0.0186856	0.00302425						NT14-aTc	0.0324772	0.037873	0.0336733	0.0346745	0.00283385
	NT24+aTc	0.0185392	0.0125293	0.0154594	0.0155093	0.00300529						NT14+aTc	0.0275039	0.0346505	0.0296302	0.0305949	0.00366966
												NT24-aTc	0.766552	0.777163	0.83939	0.794368	0.0393492
												NT24+aTc	0.681399	0.662581	0.857494	0.733825	0.107513
	Fig 4D
	24 hpi	Rep 1	Rep 2	Rep 3
	ahpC KD-aTc	5.57138e+06	8673280	8.28178e+06								Fig 4E
	ahpC KD+aTc	332132	703198	641676								IFU/ml (log10)					IFU/ml(log10)/gDNA	Rep 1	Rep 2	Rep 3	Average	STDev
												ahpC KD-aTc	6.74596	6.93818	6.91812		ahpC KD-aTc	4.68538	5.36421	4.25108	4.76689	0.561027
	48 hpi	Rep 1	Rep 2	Rep 3								ahpC KD+aTc	5.52131	5.84708	5.80732		ahpC KD+aTc	42.4478	42.3881	35.1148	39.9836	4.21657
	ahpC KD-aTc	8.99164e+08	1.62409e+09	1.60043e+09
	ahpC KD+aTc	6.49636e+06	1.46491e+07	1.51868e+07
	24 hpi
		Rep 1	Rep 2	Rep 3	Average	STDev
	ahpC KD-aTc	100	100	100	100	0
	ahpC KD+aTc	5.96139	8.10764	7.74805	7.27236	1.14948						IFU/ml (log10)					IFU/ml(log10)/gDNA	Rep 1	Rep 2	Rep 3	Average	STDev
												NT-aTc	6.86529	6.95092	6.99106		NT24-aTc	7.36252	7.35257	6.84681	7.1873	0.294917
												NT+aTc	6.7236	6.80057	6.89703		NT24+aTc	8.11165	8.43752	6.61211	7.72043	0.973563
	48 hpi	Rep 1	Rep 2	Rep 3	Average	STDev
	ahpC KD-aTc	100	100	100	100	0							ahpC KD	NT
	ahpC KD+aTc	0.722488	0.901987	0.948925	0.8578	0.11951						uni	4.76689	7.1873	0.561027	0.294917
												ind	39.9836	7.72043	4.21657	0.973563
	24 hpi	Rep 1	Rep 2	Rep 3
	NT-aTc	7.33314e+06	8.93141e+06	9796160
	NT+aTc	5.29173e+06	6.31781e+06	7889200
	48 hpi	Rep 1	Rep 2	Rep 3
	NT-aTc	1.84996e+08	3.35143e+08	273944000
	NT+aTc	120032000	2.21349e+08	183920000
	24 hpi
		Rep 1	Rep 2	Rep 3	Average	STDev
	NT-aTc	100	100	100	100	0
	NT+aTc	72.1619	70.737	80.5336	74.4775	5.2929
	48 hpi
		Rep 1	Rep 2	Rep 3	Average	STDev
	NT-aTc	100	100	100	100	0
	NT+aTc	64.8837	66.0462	67.1378	66.0226	1.12723
