# Supplementary material for: Altering the redox status of Chlamydia trachomatis directly impacts its developmental cycle progression
Source: eLife. 2025 Jan 17;13:RP98409. doi: 10.7554/eLife.98409 (PMC11741522; doi:10.7554/eLife.98409)
Supplement: Figure 5—source data 1. [file elife-98409-fig5-data1.xlsx]

## Sheet: Sheet1
Figure 5 Source Data
	Fig 5A
	24 hpi
		Rep1	Rep2	Rep3	24 hpi	STDev
	Uninf	392.333	834	315.667	514	279.767
	ahpC KD-aTc	8091.67	6757.67	2866.33	5905.22	2714.96
	ahpC KD+aTc	16312	15984	19456.7	17250.9	1917.29
	48 hpi
		Rep1	Rep2	Rep3	48 hpi	STDev
	Uninf	2273		2084.67	2178.83	133.172
	ahpC KD-aTc	15643.7	13402.3	16047	15031	1424.81
	ahpC KD+aTc	19850.7	22857.7	24620	22442.8	2411.58
