# Supplementary material for: Altering the redox status of Chlamydia trachomatis directly impacts its developmental cycle progression
Source: eLife. 2025 Jan 17;13:RP98409. doi: 10.7554/eLife.98409 (PMC11741522; doi:10.7554/eLife.98409)
Supplement: Figure 6—source data 1. [file elife-98409-fig6-data1.xlsx]

## Sheet: Sheet1
Figure 6 Source Data
	Fig 6B
	IFU/ml	ahpC KD-aTc							ahpC KD+aTc
		Rep 1	Rep 2	Rep 3	Average	STDev				Rep 1	Rep 2	Rep 3	Average	STDev
	Untreated	5.83059e+07	95251200	1.09642e+08	8.77331e+07	2.6481e+07			Untreated	7.41165e+06	7.92469e+06	7.70851e+06	7.68162e+06	257575
	CHP (62.5 μM)	5.43371e+07	8.99595e+07	1.03157e+08	8.24844e+07	2.52536e+07			CHP (62.5 μM)	2.16509e+06	1.97149e+06	1.95536e+06	2.03065e+06	116711
	H2O2 (62.5 μM)	5.78541e+07	9.36701e+07	1.03511e+08	8.50119e+07	2.40286e+07			H2O2 (62.5 μM)	1.57784e+06	1.91019e+06	2.14251e+06	1.87684e+06	283806
	TBHP (62.5 μM)	57402400	9.40573e+07	1.04609e+08	8.53561e+07	2.47768e+07			TBHP (62.5 μM)	2.03925e+06	2.23931e+06	2.18768e+06	2.15541e+06	103857
	PN (1 mM)	19553600	3.27507e+07	33880000	2.87281e+07	7.96538e+06			PN (1mM)	1.51331e+06	1.84565e+06	1694000	1684320	166385
	Percentage	Rep 1	Rep 2	Rep 3	Average	STDev			Percentage	Rep 1	Rep 2	Rep 3	Average	STDev
	Untreated	100	100	100	100	0			Untreated	100	100	100	100	0
	CHP (62.5 μM)	93.1931	94.4444	94.0848	93.9074	0.644221			CHP (62.5 μM)	29.212	24.8779	25.3663	26.4854	2.37393
	H2O2 (62.5 μM)	99.2252	98.3401	94.4085	97.3246	2.56393			H2O2 (62.5 μM)	21.2886	24.1042	27.7941	24.3956	3.26248
	TBHP (62.5 μM)	98.4505	98.7466	95.4091	97.5354	1.84739			TBHP (62.5 μM)	27.5141	28.2573	28.3801	28.0505	0.468546
	PN (1 mM)	33.5362	34.3835	30.9005	32.9401	1.81639			PN (1 mM)	20.4179	23.2899	21.9757	21.8945	1.4377
	Fig 6D
	NT-aTc									NT+aTc
	IFU/ml	Rep 1	Rep 2	Rep 3	IFU/ml	STDev				IFU/ml	Rep 1	Rep 2	Rep 3	IFU/ml	STDev
	Untreated	5.65635e+07	8.68619e+07	9.20568e+07	7.8494e+07	1.91692e+07				Untreated	4.51411e+07	7.46005e+07	8.06989e+07	6.68135e+07	1.9015e+07
	CHP (62.5 μM)	5.38531e+07	8.33125e+07	8.91851e+07	7.54502e+07	1.89328e+07				CHP (62.5 μM)	4.63995e+07	7.12125e+07	7.76981e+07	6.51034e+07	1.65195e+07
	H2O2 (62.5 μM)	5.44016e+07	8.42805e+07	9.10243e+07	76568800	1.94912e+07				H2O2 (62.5 μM)	4.48829e+07	7.26e+07	80537600	6.60068e+07	1.87194e+07
	TBHP (62.5 μM)	5.25301e+07	8.38611e+07	89733600	7.53749e+07	2.00009e+07				TBHP (62.5 μM)	45399200	74439200	8.02795e+07	6.6706e+07	1.86818e+07
	PN (1 mM)	1.56171e+07	2.94595e+07	2.73621e+07	2.41462e+07	7.46053e+06				PN (1 mM)	17424000	2.46517e+07	2.41677e+07	2.20812e+07	4.04047e+06
	Percentage									Percentage
		Rep 1	Rep 2	Rep 3	Percentage	STDev					Rep 1	Rep 2	Rep 3	Percentage	STDev
	Untreated	100	100	100	100	0				Untreated	100	100	100	100	0
	CHP (62.5 μM)	95.2082	95.9138	96.8805	96.0008	0.83952				CHP (62.5 μM)	102.788	95.4585	96.2815	98.1759	4.01509
	H2O2 (62.5 μM)	96.178	97.0282	98.8784	97.3615	1.3807				H2O2 (62.5 μM)	99.4282	97.3183	99.8001	98.8489	1.33845
	TBHP (62.5 μM)	92.8694	96.5453	97.4763	95.6303	2.43597				TBHP (62.5 μM)	100.572	99.7837	99.4802	99.9453	0.563454
	PN (1 mM)	27.6098	33.9153	29.7231	30.4161	3.20936				PN (1 mM)	38.599	33.045	29.948	33.864	4.38326
