# Supplementary material for: Altering the redox status of Chlamydia trachomatis directly impacts its developmental cycle progression
Source: eLife. 2025 Jan 17;13:RP98409. doi: 10.7554/eLife.98409 (PMC11741522; doi:10.7554/eLife.98409)
Supplement: Figure 7—figure supplement 1—source data 1. [file elife-98409-fig7-figsupp1-data1.xlsx]

## Sheet: Sheet1
Supplementary Figure 6 Source Data
	Fig S6B
	IFU/ml
		Rep 1	Rep 2	Rep 3
	Untreated	3.48265e+07	4.02258e+07	3.74939e+07
	H2O2 (500 μM)	17036800	2.09303e+07	1.90373e+07
	𝜶-Tocopherol (100 μM)	2.75342e+07	3.28475e+07	3.42242e+07
	DMTU (10 mM)	3.85049e+07	4.12153e+07	3.87415e+07
	H2O2 (500 μM) + 𝜶-Tocopherol (100 μM)	3.91502e+07	4.17961e+07	39494400
	H2O2 (500 μM) + DMTU (10 mM)	3.98386e+07	4.88517e+07	4.89593e+07
	Percentage
		Rep 1	Rep 2	Rep 3	Average	STDev
	Untreated	100	100	100	100	0
	H2O2 (500 μM)	48.9191	52.0321	50.7745	50.5752	1.56604
	𝜶-Tocopherol (100 μM)	79.0611	81.6578	91.2794	83.9994	6.43693
	DMTU (10 mM)	110.562	102.46	103.328	105.45	4.44852
	H2O2 (500 μM) + 𝜶-Tocopherol (100 μM)	112.415	103.904	105.336	107.218	4.55726
	H2O2 (500 μM) + DMTU (10 mM)	114.392	121.444	130.579	122.138	8.11624
