# Supplementary material for: Altering the redox status of Chlamydia trachomatis directly impacts its developmental cycle progression
Source: eLife. 2025 Jan 17;13:RP98409. doi: 10.7554/eLife.98409 (PMC11741522; doi:10.7554/eLife.98409)
Supplement: Figure 7—source data 1. [file elife-98409-fig7-data1.xlsx]

## Sheet: Sheet1
Figure 7 Source Data
	Fig 7A
		Efficiency	Efficiency	Efficiency					Fig 7C
		107.337	108.708	107.591	Efficiency apply					Efficiency
		Rep1	Rep2	Rep3	Rep1	Rep2	Rep3			81.7118	Rep 1	Rep 2	Rep 3
	Comp14-aTc	0.00419276	0.00507955	0.00373981	0.00450038	0.00552187	0.00402369			Comp 14-aTcA	0.0313694	0.0269793	0.0364352
	Comp14+aTc	0.0101351	0.0160402	0.0111274	0.0108787	0.017437	0.0119721			Comp 14+aTcA	0.0424769	0.0360149	0.0432207
	Comp24-aTc	0.0108491	0.0157939	0.0155692	0.0116451	0.0171692	0.0167511			Comp 24-aTcA	0.784137	0.799305	0.865221
	Comp24+aTc	0.0570508	0.0664439	0.06395	0.0612366	0.0722299	0.0688044			Comp 24+aTcA	0.97961	0.888798	1.03136
										Efficiency apply
	cDNA/gDNA	Rep1	Rep2	Rep3	Average	STDev				Rep 1	Rep 2	Rep 3	Average	STDev
	Comp14-aTc	0.175573	0.250479	0.135151	0.187067	0.0585169				0.0256326	0.0220453	0.0297719	0.0258166	0.00386661
	Comp14+aTc	0.313428	0.592522	0.338996	0.414982	0.154285				0.0347087	0.0294285	0.0353165	0.0331512	0.00323826
	Comp24-aTc	0.0181746	0.0262877	0.0236936	0.0227186	0.00414349				0.640734	0.653128	0.706989	0.66695	0.0352243
	Comp24+aTc	0.0765018	0.0994554	0.0816429	0.0858667	0.0120456				0.800459	0.726254	0.842749	0.789821	0.0589714
	Fig 7D									Fig 7F
		24 hpi									Comp-aTc						Comp+aTc
		Rep 1	Rep 2	Rep 3							Rep 1	Rep 2	Rep 3					Rep 1	Rep 2	Rep 3
	Comp-aTc	7.89028e+06	1.19064e+07	8034400						Untreated	4.65931e+07	6.90829e+07	90314400				Untreated	3.72357e+07	55756800	7.96341e+07
	Comp+aTc	5.52405e+06	9776800	6.03064e+06						CHP (62.5 uM)	41720800	6.56949e+07	8.97659e+07				CHP (62.5 uM)	3.52029e+07	5.34659e+07	7.85371e+07
		48 hpi								H2O2 (62.5 uM)	4.41085e+07	68050400	8.81203e+07				H2O2 (62.5 uM)	3.51061e+07	53143200	77052800
		Rep 1	Rep 2	Rep 3						TBHP (62.5 uM)	4.56251e+07	6.73083e+07	8.87011e+07				TBHP (62.5 uM)	34848000	55756800	7.73755e+07
	Comp-aTc	276848000	400752000	259424000						PN (1 mM)	1.42941e+07	2.10379e+07	2.53293e+07				PN (1 mM)	1.48427e+07	2.21995e+07	2.80075e+07
	Comp+aTc	1.89513e+08	323312000	2.07152e+08
											Rep 1	Rep 2	Rep 3	Percentage	STDev			Rep 1	Rep 2	Rep 3	Percentage	STDev
										Untreated	100	100	100	100	0		Untreated	100	100	100	100	0
		Rep 1	Rep 2	Rep 3	Average	STDev				CHP (62.5 uM)	89.5429	95.0957	99.3926	94.6771	4.93818		CHP (62.5 uM)	94.5407	95.8912	98.6224	96.3514	2.07938
	Comp-aTc	100	100	100	100	0				H2O2 (62.5 uM)	94.6676	98.5054	97.5706	96.9145	2.00124		H2O2 (62.5 uM)	94.2808	95.3125	96.7585	95.4506	1.24463
	Comp+aTc	70.0109	82.1138	75.0602	75.7283	6.07905				TBHP (62.5 uM)	97.9224	97.4311	98.2136	97.8557	0.395512		TBHP (62.5 uM)	93.5875	100	97.1637	96.9171	3.21335
										PN (1 mM)	30.6787	30.4531	28.0457	29.7258	1.45937		PN (1 mM)	39.8614	39.8148	35.1702	38.2821	2.69512
		Rep 1	Rep 2	Rep 3	Average	STDev
	Comp-aTc	100	100	100	100	0
	Comp+aTc	68.4538	80.6763	79.8507	76.3269	6.83086
	Fig 7G
	ahpC KD-aTc	Rep 1	Rep 2	Rep 3				ahpC KD+aTc	Rep 1	Rep 2	Rep 3
	Untreated	4.02903e+07	7.87522e+07	7.70313e+07				Untreated	3.86555e+06	8.08388e+06	8.01074e+06
	𝜶-Tocopherol (100uM)	37752000	7.46005e+07	7.05134e+07				𝜶-Tocopherol (100uM)	3.23312e+07	6.90076e+07	7.44715e+07
	DMTU (10 mM)	4.32588e+07	81118400	7.95696e+07				DMTU (10 mM)	35816000	6.80612e+07	7.35035e+07
	ahpC KD-aTc	Rep 1	Rep 2	Rep 3	Average	STDev		ahpC KD+aTc	Rep 1	Rep 2	Rep 3	Average	STDev
	Untreated	100	100	100	100	0		Untreated	9.59423	10.265	10.3993	10.0862	0.431297
	𝜶-Tocopherol (100uM)	93.6999	94.7282	91.5387	93.3223	1.62796		𝜶-Tocopherol (100uM)	80.2456	87.6263	96.6769	88.1829	8.22978
	DMTU (10 mM)	107.368	103.005	103.295	104.556	2.43956		DMTU (10 mM)	88.8948	86.4245	95.4203	90.2465	4.64773
