# Supplementary material for: Altering the redox status of Chlamydia trachomatis directly impacts its developmental cycle progression
Source: eLife. 2025 Jan 17;13:RP98409. doi: 10.7554/eLife.98409 (PMC11741522; doi:10.7554/eLife.98409)
Supplement: Figure 8—figure supplement 1—source data 1. [file elife-98409-fig8-figsupp1-data1.xlsx]

## Sheet: Sheet1
Supplementary Figure 7 Source Data
	Fig S7A									Fig S7B
	ahpC	Efficiency	Efficiency	Efficiency								Rep 1	Rep 2	Rep 3		Efficiecy apply=A*(0.01*Efficiency)	A*(0.01*Efficiency)
		107.337	108.708	107.591	Efficiency apply					ahpC		Efficiency	Efficiency	Efficiency
		Rep1	Rep2	Rep3	Rep1	Rep2	Rep3					107.337	108.708	107.591	Rep 1	Rep 2	Rep 3
	Comp14-aTc	0.00419276	0.00507955	0.00373981	0.00450038	0.00552187	0.00402369				14-aTc	0.003	0.005	0.004	0.003	0.005	0.004
	Comp14+aTc	0.0101351	0.0160402	0.0111274	0.0108787	0.017437	0.0119721				14+aTc	0.044	0.066	0.051	0.047	0.071	0.055
	Comp24-aTc	0.0108491	0.0157939	0.0155692	0.0116451	0.0171692	0.0167511				24-aTc		0.025	0.022		0.027	0.023
	Comp24+aTc	0.0570508	0.0664439	0.06395	0.0612366	0.0722299	0.0688044				24+aTc	0.663	0.977	0.654	0.711	1.062	0.703
	cDNA/gDNA	Rep1	Rep2	Rep3	Average	STDev					cDNA/gDNA	Rep1	Rep2	Rep3	Average	STDev
	Comp14-aTc	0.175573	0.250479	0.135151	0.187067	0.0585169					14-aTc	0.155571	0.185005	0.201616	0.181	0.0233179
	Comp14+aTc	0.313428	0.592522	0.338996	0.414982	0.154285					14+aTc	1.44404	2.39101	2.31686	2.051	0.526633
	Comp24-aTc	0.0181746	0.0262877	0.0236936	0.0227186	0.00414349					24-aTc		0.0420855	0.0435841	0.029	0.0247389
	Comp24+aTc	0.0765018	0.0994554	0.0816429	0.0858667	0.0120456					24+aTc	0.477285	0.651928	0.39177	0.507	0.132599
		Efficiency	Efficiency	Efficiency							hctA	Efficiency	Efficiency	Efficiency	Efficiency apply
	hctA	93.9709	96.432	95.2903	Efficiency apply							93.9709	96.432	95.2903
		Rep1	Rep2	Rep3	Rep1	Rep2	Rep3				OV14-aTcA	6.47879e-05	7.90535e-05	0.000112027	6.08818e-05	7.62329e-05	0.000106751
	Comp14-aTcA	8.67439e-05	7.10516e-05	5.78236e-05	8.15141e-05	6.85165e-05	5.51001e-05				OV14+aTcA	3.85932e-05	2.56385e-05		3.62664e-05	2.47238e-05	8.13856e-05
	Comp14+aTcA	5.73329e-05	6.24766e-05	5.72226e-05	5.38763e-05	6.02475e-05	5.45274e-05				OV24-aTcA	0.267389	0.247879	0.334065	0.251268	0.239035	0.318331
	Comp24-aTcA	0.166084	0.106906	0.131732	0.156071	0.103091	0.125527				OV24+aTcA	0.12953	0.15247	0.229503	0.12172	0.14703	0.218693
	Comp24+aTcA	0.0904326	0.074939	0.0872794	0.0849804	0.0722652	0.0831686
											cDNA/gDNA	Rep1	Rep2	Rep3	Average	STDev
	cDNA/gDNA	Rep1	Rep2	Rep3	Average	STDev					14-aTc	0.00287178	0.0028749	0.00525544	0.00366737	0.00137531
	Comp14-aTc	0.0031801	0.00310799	0.00185074	0.00271294	0.00074756					14+aTc	0.001113	0.000828763		0.000970883	0.000200987
	Comp14+aTc	0.00155224	0.00204725	0.00154397	0.00171448	0.000288211					24-aTc	0.391571	0.366839	0.594495	0.450968	0.124912
	Comp24-aTc	0.243582	0.157843	0.177552	0.192992	0.0449064					24+aTc	0.0816948	0.0902171	0.121836	0.0979158	0.0211489
	Comp24+aTc	0.106165	0.099504	0.0986873	0.101452	0.00410162
												Rep 1	Rep 2	Rep 3
	hctB	Efficiency	Efficiency	Efficiency							hctB	Efficiency	Efficiency	Efficiency
		98.2455	98.2455	97.7879	Efficiency apply							98.2455	98.2455	97.7879	Efficiency apply
		Rep1	Rep2	Rep3	Rep1	Rep2	Rep3				OV14-aTcA	0.000311658	0.000267311	0.000261111	0.000306189	0.00026262	0.000306189
	Comp14-aTcA	0.000163348	0.000140753	0.000144196	0.000160481	0.000138283	0.000141007				OV14+aTcA	0.000170968	0.000136208	0.000128804	0.000167967	0.000133818	0.000167967
	Comp14+aTcA	0.000208122	0.000165842	0.000147253	0.00020447	0.000162931	0.000143995				OV24-aTcA	0.0916349	0.0874496	0.0755237	0.0900267	0.0859148	0.0900267
	Comp24-aTcA	0.141746	0.105685	0.0899798	0.139258	0.10383	0.0879894				OV24+aTcA	0.0313431	0.0251332	0.0213292	0.030793	0.0246921	0.030793
	Comp24+aTcA	0.0789337	0.0662346	0.0589779	0.0775484	0.0650722	0.0576733
											cDNA/gDNA	Rep1	Rep2	Rep3	Average	STDev
	cDNA/gDNA	Rep1	Rep2	Rep3	Average	STDev					14-aTc	0.0144428	0.00990393	0.015074	0.0131402	0.00282044
	Comp14-aTc	0.00626085	0.00627267	0.00473623	0.00575658	0.000883671					14+aTc	0.00515486	0.0044857	0.00707874	0.0055731	0.00134616
	Comp14+aTc	0.00589102	0.00553651	0.00407729	0.00516827	0.000961305					24-aTc	0.140296	0.131851	0.168128	0.146758	0.0189826
	Comp24-aTc	0.217341	0.158974	0.124456	0.166924	0.04695					24+aTc	0.0206673	0.015151	0.017155	0.0176578	0.0027923
	Comp24+aTc	0.0968799	0.0895998	0.0684347	0.0849715	0.0147766
		Efficiency									omcB	Rep 1	Rep 2	Rep 3
		88.528			Efficiency apply							Efficiency
	omcB	Rep1	Rep2	Rep3	Rep1	Rep2	Rep3					88.528			Efficiency apply
	Comp14-aTcA	6.15432e-05	5.83811e-05	8.57614e-05	5.44829e-05	5.16836e-05	7.59229e-05				OV14-aTcA	2.83896e-05	6.1023e-05	3.48025e-05	2.51327e-05	5.40225e-05	3.081e-05
	Comp14+aTcA	6.62426e-05	5.67712e-05	7.70871e-05	5.86433e-05	5.02584e-05	6.82437e-05				OV14+aTcA	1.57823e-05	1.90964e-05		1.39718e-05	1.69057e-05	2.7132e-05
	Comp24-aTcA	0.0667363	0.0730145	0.129978	0.0590803	0.0646383	0.115067				OV24-aTcA	0.0850973	0.0815364	0.0838413	0.075335	0.0721826	0.0742231
	Comp24+aTcA	0.0736792	0.0659391	0.105083	0.0652268	0.0583746	0.0930275				OV24+aTcA	0.0717544	0.0558428	0.0815881	0.0635227	0.0494365	0.0722284
	cDNA/gDNA	Rep1	Rep2	Rep3	Average	STDev					cDNA/gDNA	Rep1	Rep2	Rep3	Average	STDev
	Comp14-aTc	0.00212554	0.00234443	0.00255015	0.00234004	0.00021234					14-aTc	0.0011855	0.0020373	0.00151681	0.00157987	0.000429385
	Comp14+aTc	0.00168958	0.00170781	0.00193235	0.00177658	0.000135205					14+aTc	0.000428789	0.000566693		0.000497741	9.75132e-05
	Comp24-aTc	0.0922072	0.0989672	0.162757	0.117977	0.0389274					24-aTc	0.117401	0.110776	0.138615	0.122264	0.0145424
	Comp24+aTc	0.0814867	0.0803776	0.110386	0.09075	0.0170141					24+aTc	0.0426344	0.0303341	0.0402389	0.0377358	0.00652104
	tsp	Efficiency									tsp	Rep 1	Rep 2	Rep 3
		96.5799			Efficiency apply							Efficiency
		Rep1	Rep2	Rep3	Rep1	Rep2	Rep3					96.5799			Efficiency apply
	Comp14-aTcA	2.15615e-05	1.64209e-05	2.10441e-05	2.08241e-05	1.58593e-05	2.03244e-05				OV14-aTcA	6.497e-05	0.00011224	9.32319e-05	6.2748e-05	0.000108402	9.00434e-05
	Comp14+aTcA	9.55917e-06	9.48472e-06	8.37933e-06	9.23224e-06	9.16034e-06	8.09276e-06				OV14+aTcA	2.1293e-05	1.59434e-05	1.2105e-05	2.05648e-05	1.53982e-05	1.1691e-05
	Comp24-aTcA	0.081764	0.0917711	0.14399	0.0789677	0.0886325	0.139065				OV24-aTcA	0.101664	0.0836253	0.0967413	0.0981875	0.0807653	0.0934328
	Comp24+aTcA	0.0170168	0.0192626	0.0236297	0.0164348	0.0186038	0.0228215				OV24+aTcA	0.0217988	0.0209221	0.0208806	0.0210532	0.0202066	0.0201665
											cDNA/gDNA	Rep1	Rep2	Rep3	Average	STDev
	cDNA/gDNA	Rep1	Rep2	Rep3	Average	STDev					14-aTc	0.0029598	0.00408805	0.00443293	0.00382693	0.000770496
	Comp14-aTc	0.000812407	0.000719396	0.000682671	0.000738158	6.68719e-05					14+aTc	0.000631126	0.000516161	0.000492701	0.000546663	7.40819e-05
	Comp14+aTc	0.000265992	0.000311274	0.00022915	0.000268805	4.11346e-05					24-aTc	0.153014	0.123948	0.174489	0.150484	0.0253655
	Comp24-aTc	0.123246	0.135705	0.196701	0.151884	0.0393093					24+aTc	0.0141303	0.0123987	0.0112349	0.012588	0.00145693
	Comp24+aTc	0.0205318	0.0256161	0.0270799	0.0244092	0.00343683
											glgA	Rep 1	Rep 2	Rep 3
	glgA	Efficiency										Efficiency
		86.4282			Efficiency apply							86.4282			Efficiency apply
		Rep1	Rep2	Rep3	Rep1	Rep2	Rep3				OV14-aTcA	6.89331e-05	3.45169e-05	3.55377e-05	5.95775e-05	2.98323e-05	3.07145e-05
	Comp14-aTcA	2.32432e-05	3.75476e-05	3.86135e-05	2.00887e-05	3.24516e-05	3.33729e-05				OV14+aTcA		2.07964e-05	2.11987e-05		1.7974e-05	1.83216e-05
	Comp14+aTcA	1.17264e-05	9.02639e-06	9.99864e-06	1.01349e-05	7.80133e-06	8.64162e-06				OV24-4aTcA	0.0454578	0.0465797	0.0367179	0.0392882	0.0402579	0.0317346
	Comp24-aTcA	0.0459634	0.0520278	0.0654605	0.0397253	0.0449666	0.0565762				OV24+4aTcA	0.0120645	0.00639984	0.0118338	0.0104271	0.00553126	0.0102277
	Comp24+aTcA	0.00373166	0.00483681	0.00485473	0.0032252	0.00418036	0.00419585				cDNA/gDNA	Rep1	Rep2	Rep3	Average	STDev
	cDNA/gDNA	Rep1	Rep2	Rep3	Average	STDev					14-aTc	0.00281025	0.00112504	0.00151211	0.0018158	0.000882699
	Comp14-aTc	0.000783717	0.00147204	0.00112095	0.00112557	0.000344187					14+aTc		0.000602503	0.000772137	0.00068732	0.000119949
	Comp14+aTc	0.000291998	0.000265094	0.000244691	0.000267261	2.37279e-05					24-aTc	0.061226	0.0617825	0.0592656	0.0607581	0.00132211
	Comp24-aTc	0.0619997	0.068848	0.0800241	0.0702906	0.0090984					24+aTc	0.00699835	0.00339396	0.00569795	0.00536342	0.00182533
	Comp24+aTc	0.00402919	0.00575605	0.00497877	0.00492133	0.000864863
