# Supplementary material for: Altering the redox status of Chlamydia trachomatis directly impacts its developmental cycle progression
Source: eLife. 2025 Jan 17;13:RP98409. doi: 10.7554/eLife.98409 (PMC11741522; doi:10.7554/eLife.98409)
Supplement: Figure 8—figure supplement 2—source data 1. [file elife-98409-fig8-figsupp2-data1.xlsx]

## Sheet: Sheet1
Supplementary Figure 8 Source Data
	Fig S8B
	16SrRNA	Rep 1			Rep 2			Rep 3					Fig S8C	Rep 1			Rep 2			Rep 3
		16 hpi	24 hpi	Efficiency	16 hpi	24 hpi	Efficiency	16 hpi	24 hpi				hctA	16 hpi	24 hpi	Efficiency	16 hpi	24 hpi	Efficiency	16 hpi	24 hpi
	ahpC-aTc	0.183995	0.473714	69.518	0.250802	0.600747	94.6862	0.390419	0.989098				ahpC-aTc	0.00047397	0.496174	84.3545	0.000439134	0.595973	96.619	0.000430478	0.522309
	ahpC+aTc	0.0752452	0.0713778		0.0877677	0.0807956		0.128763	0.109326				ahpC+aTc	0.00511828	0.0237337		0.00463209	0.019111		0.00269757	0.018974
	ahpC-aTc+Pen	0.179852	0.94764		0.261671	0.489371		0.390019	0.807128				ahpC-aTc+Pen	0.00022939	0.0227195		0.000204411	0.0257809		0.000214236	0.0256723
	ahpC+aTc+Pen	0.138403	0.0984761		0.117995	0.0855998		0.180498	0.126292				ahpC+aTc+Pen	0.000943536	0.203546		0.000742811	0.119171		0.000628987	0.106625
	Efficiency apply												Efficiency apply
		Rep 1		Rep 2		Rep 3
		16 hpi	24 hpi	16 hpi	24 hpi	16 hpi	24 hpi							Rep 1		Rep 2		Rep 3
	ahpC-aTc	0.12791	0.329317	0.237474	0.568823	0.37561	0.951582						ahpC-aTc	16 hpi	24 hpi	16 hpi	24 hpi	16 hpi	24 hpi
	ahpC+aTc	0.052309	0.0496204	0.0831038	0.0765021	0.123879	0.105179						ahpC+aTc	0.000399813	0.418543	0.000424287	0.575823	0.000404395	0.490663
	ahpC-aTc+Pen	0.125029	0.658781	0.247766	0.463366	0.375226	0.776514						ahpC-aTc+Pen	0.00431748	0.0200204	0.00447548	0.017953	0.00253413	0.0178244
	ahpC+aTc+Pen	0.096215	0.0684586	0.111725	0.081051	0.173652	0.121502						ahpC+aTc+Pen	0.0001935	0.0191648	0.000192026	0.0249092	0.000201256	0.0241169
														0.000795911	0.171699	0.000717696	0.115142	0.000590877	0.100165
													cDNA/16SrRNA	16 hpi	24 hpi	16 hpi	24 hpi	16 hpi	24 hpi
	ahpC	Rep 1			Rep 2			Rep 3					ahpC-aTc	0.00312574	1.27094	0.00178666	1.01231	0.00107664	0.515628
		16 hpi	24 hpi	Efficiency	16 hpi	24 hpi	Efficiency	16 hpi	24 hpi				ahpC+aTc	0.082538	0.40347	0.0538541	0.234674	0.0204564	0.169467
	ahpC-aTc	0.0148084	0.0662915	98.9356	0.0142884	0.0898046	96.7558	0.0174887	0.137937				ahpC-aTc+Pen	0.00154763	0.0290913	0.00077503	0.0537572	0.000536358	0.0310579
	ahpC+aTc	0.00128384	0.000189695		0.00180279	0.000244836		0.00266242	0.000348466				ahpC+aTc+Pen	0.00827221	2.50807	0.00642376	1.42061	0.00340265	0.824392
	ahpC-aTc+Pen	0.0174684	0.00776413		0.01351	0.00455075		0.0166251	0.00563866
	ahpC+aTc+Pen	0.00119613	0.000207775		0.00144497	0.000291559		0.00185747	0.0002538
													Fig S8D
	Efficiency apply	Rep 1		Rep 2		Rep 3							hctB	Rep 1			Rep 2			Rep 3
		16 hpi	24 hpi	16 hpi	24 hpi	16 hpi	24 hpi							16 hpi	24 hpi	Efficiency	16 hpi	24 hpi	Efficiency	16 hpi	24 hpi
	ahpC-aTc	0.0146508	0.0655862	0.0138249	0.0868914	0.0175306	0.138268						ahpC-aTc	7.48015e-05	0.0157569	75.8588	5.6559e-05	0.0154006	97.1724	4.67438e-05	0.0144428
	ahpC+aTc	0.00127018	0.000187676	0.00174431	0.000236893	0.00266881	0.000349302						ahpC+aTc	0.000106274	0.000695226		0.000140131	0.000366005		0.000133429	0.000267166
	ahpC-aTc+Pen		0.00768152	0.0130717	0.00440312	0.016665	0.00565219						ahpC-aTc+Pen	9.9438e-05	0.000583711		0.000108098	0.000343384		0.00010781	0.000261253
	ahpC+aTc+Pen	0.0011834	0.000205564	0.00139809	0.000282101	0.00186193	0.000254409						ahpC+aTc+Pen	9.53301e-05	0.000691454		0.000177139	0.000496662		0.000292574	0.00174214
		Rep 1		Rep 2		Rep 3							Efficiency apply
	cDNA/16SrRNA	16 hpi	24 hpi	16 hpi	24 hpi	16 hpi	24 hpi							Rep 1		Rep 2		Rep 3
	ahpC-aTc	0.114541	0.199158	0.0582163	0.152756	0.0466724	0.145304							16 hpi	24 hpi	16 hpi	24 hpi	16 hpi	24 hpi
	ahpC+aTc	0.0242823	0.00378224	0.0209895	0.00309656	0.0215436	0.00332102						ahpC-aTc	5.67437e-05	0.011953	5.49595e-05	0.0149651	4.63381e-05	0.0143175
	ahpC-aTc+Pen		0.0116602	0.0527585	0.00950248	0.0444133	0.00727893						ahpC+aTc	8.06187e-05		0.000136168	0.000355654	0.000132271	0.000264847
	ahpC+aTc+Pen	0.0122995	0.00300276	0.0125137	0.00348054	0.0107222	0.00209387						ahpC-aTc+Pen		0.000442797	0.000105041	0.000333673	0.000106874
													ahpC+aTc+Pen	7.23164e-05	0.00052453	0.000172129	0.000482617	0.000290034
														Rep 1		Rep 2		Rep 3
													cDNA/16SrRNA	16 hpi	24 hpi	16 hpi	24 hpi	16 hpi	24 hpi
													ahpC-aTc	0.000443623	0.0362963	0.000231433	0.0263088	0.000123367	0.015046
													ahpC+aTc	0.0015412		0.00163854	0.00464894	0.00106774	0.00251805
													ahpC-aTc+Pen		0.000672146	0.000423952	0.000720108	0.000284826
													ahpC+aTc+Pen	0.000751613	0.007662	0.00154065	0.00595448	0.0016702
