# Supplementary material for: Altering the redox status of Chlamydia trachomatis directly impacts its developmental cycle progression
Source: eLife. 2025 Jan 17;13:RP98409. doi: 10.7554/eLife.98409 (PMC11741522; doi:10.7554/eLife.98409)
Supplement: Figure 8—source data 1. [file elife-98409-fig8-data1.xlsx]

## Sheet: Sheet1
Figure 8 Source Data
	Fig 8A										Fig 8B
		Efficiency	Efficiency	Efficiency								log2 fold change	- Log10(p value)
	ahpC	107.337	108.708	107.591							hct2	3.18523	272
		Rep 1	Rep 2	Rep 3	Efficiency apply	Rep 1	Rep 2	Rep 3			ahpC	-3.41457	276.097
	ahpC KD14-aTc	0.0016376	0.002036	0.00158089	ahpC KD14-aTc	0.00175775	0.00221329	0.0017009			copB	2.68776	266.433
	ahpC KD14+aTc	0.000646823	0.000825101	0.000673876	ahpC KD14+aTc	0.00069428	0.000896951	0.00072503			CTL0886	2.64663	265.128
	ahpC KD24-aTc	0.0286081	0.0391481	0.0354434	ahpC KD24-aTc	0.0307071	0.0425571	0.0381339			trmB	-2.95418	209.243
	ahpC KD24+aTc	0.000734904	0.000924679	0.000724083	ahpC KD24+aTc	0.000788823	0.0010052	0.000779048			pfkA_2	-2.17492	204.004
											CTL0338	2.45922	196.217
	cDNA/gDNA	Rep1	Rep2	Rep3	Average	STDev					copD	2.43511	193.679
	ahpC KD14-aTc	0.144285	0.157632	0.125991	0.142636	0.0158848					scc2	2.46388	179.003
	ahpC KD14+aTc	0.0148392	0.0169788	0.0113043	0.0143741	0.00286571					aspC_2	-2.08223	163.908
	ahpC KD24-aTc	0.0197519	0.030472	0.0217015	0.0239752	0.00571028					CTL0186	2.81293	163.873
	ahpC KD24+aTc	0.00561645	0.00674879	0.00436262	0.00557596	0.0011936					CTL0884	1.89071	161.097
											dnaK	1.82578	159.508
											CTL0433	2.05014	154.216
	hctA	Efficiency	Efficiency	Efficiency							CTL0260	2.15891	151.416
		93.9709	96.432	95.2903		Efficiency apply					CTL0255	1.74598	145.737
		Rep 1	Rep 2	Rep 3		cDNA	Rep1	Rep2	Rep3		CTL0431	-2.10879	137.544
	ahpC KD14-aTc	2.35715e-05	2.08143e-05	2.57931e-05		ahpC KD14-aTc	2.21504e-05	2.00716e-05	2.45783e-05		omcA	1.86072	133.992
	ahpC KD14+aTc	0.00128689	0.00162727	0.00178168		ahpC KD14+aTc	0.0012093	0.0015692	0.00169776		CTL0063	2.0691	132.174
	ahpC KD24-aTc	0.470705	0.480085	0.504371		ahpC KD24-aTc	0.442326	0.462956	0.480615		CTL0314	-1.93879	128.233
	ahpC KD24+aTc	0.0175796	0.0140605	0.0152386		ahpC KD24+aTc	0.0165197	0.0135588	0.0145208		CTL0883	1.74301	127.734
											tarp	1.6856	126.811
	cDNA/gDNA	Rep1	Rep2	Rep3	Average	STDev					CTL0840	2.63769	125.266
	ahpC KD14-aTc	0.00181821	0.00142951	0.00182059	0.00168944	0.000225106					omcB	1.55372	120.851
	ahpC KD14+aTc	0.0258471	0.0297042	0.0264706	0.0273406	0.00207048					hsp60_1	1.55925	116.69
	ahpC KD24-aTc	0.28452	0.331489	0.273512	0.296507	0.030791					tsp	1.90982	114.189
	ahpC KD24+aTc	0.117621	0.0910321	0.081316	0.0966563	0.0187946					CTL0726	-1.88356	112.363
											CTL0686	-1.99975	104.863
	hctB	Efficiency	Efficiency	Efficiency							CTL0185	2.43994	101.912
		98.2455	98.2455	97.7879							ubiE	-1.72156	96.8938
		Rep1	Rep2	Rep3		Efficiency apply	Rep1	Rep2	Rep3		CTL0329	1.54756	92.3688
	ahpC KD14-aTc	0.000150528	0.000108186	0.000102351		ahpC KD14-aTc	0.000147886	0.000106287	0.000100087		CTL0432	-1.43586	90.7982
	ahpC KD14+aTc	0.00629318	0.00565991	0.0045248		ahpC KD14+aTc	0.00618274	0.00556058	0.00442471		CTL0221	2.26434	90.152
	ahpC KD24-aTc	0.405071	0.330165	0.277846		ahpC KD24-aTc	0.397962	0.324371	0.2717		CTL0252	-1.81789	84.5441
	ahpC KD24+aTc	0.0133168	0.0102549	0.00932631		ahpC KD24+aTc	0.0130831	0.010075	0.00912002		CTL0466	1.40004	84.2185
											CTL0828	1.29153	83.3093
	cDNA/gDNA	Rep1	Rep2	Rep3	Average	STDev					grpE	1.59283	82.8758
	ahpC KD14-aTc	0.0121392	0.00756986	0.00741381	0.00904095	0.00268429					CTL0659	-1.30285	81.2205
	ahpC KD14+aTc	0.132147	0.105259	0.0689876	0.102131	0.0316957					CTL0220	1.99715	80.9883
	ahpC KD24-aTc	0.255983	0.232258	0.154621	0.214287	0.0530167					CTL0472	-1.84141	80.9702
	ahpC KD24+aTc	0.0931518	0.0676421	0.0510716	0.0706218	0.0211978					CTL0064	1.66499	79.4168
											CTL0619	1.39736	79.3841
	omcB										CTL0003	1.58967	78.7333
		Efficiency									ispH	1.32221	77.1487
		86.8638			Efficiency apply						sucA	1.38826	75.5585
		Rep1	Rep2	Rep3		Rep1	Rep2	Rep3			CTL0650	1.30273	74.8214
	ahpC KD14-aTc	0.000132431	8.65612e-05	0.00013203	ahpC KD14-aTc	0.000115035	7.51905e-05	0.000114687			CTL0184	1.51208	74.8145
	ahpC KD14+aTc	0.00488734	0.00303716	0.00387533	ahpC KD14+aTc	0.00424534	0.00263819	0.00336627			CTL0272	1.25573	74.5495
	ahpC KD24-aTc	0.0864064	0.0877963	0.154026	ahpC KD24-aTc	0.0750561	0.0762634	0.133793			ruvC	-1.48363	73.3593
	ahpC KD24+aTc	0.0136378	0.0139209	0.00902387	ahpC KD24+aTc	0.0118463	0.0120922	0.00783849			CTL0887	1.22732	71.4633
	cDNA/gDNA	Rep1	Rep2	Rep3	Average	STDev					CTL0382	-1.64317	70.2966
	ahpC KD14-aTc	0.0094426	0.00535513	0.00849524	0.00776432	0.00213952					CTL0369	-1.30893	70.2009
	ahpC KD14+aTc	0.0907379	0.0499395	0.0524849	0.0643875	0.0228556					glgA	1.17827	70.1775
	ahpC KD24-aTc	0.0482787	0.0546066	0.07614	0.0596751	0.0146059					ftsH	1.18259	68.7303
	ahpC KD24+aTc	0.0843464	0.0811858	0.0438951	0.0698091	0.0224977					CTL0399	1.20134	68.3993
											CTL0648	1.83729	68.2403
											CTL0430	-1.36526	66.6111
	tsp	Efficiency	Efficiency	Efficiency							pth	-1.25788	65.6098
		88.6962	88.6962	88.6962	Efficiency apply						dppD	-1.22002	65.4485
		Rep1	Rep2	Rep3	cDNA	Rep1	Rep2	Rep3			CTL0053	-1.33554	65.3207
	KD14-aTcA	8.97922e-05	0.000134595	0.000162197	KD14-aTc	7.96421e-05	0.00011938	0.000143862			lon	1.16001	64.0818
	KD14+aTcA	0.00501118	0.00663036	0.00676188	KD14+aTc	0.00444471	0.00588087	0.00599751			CTL0196	-1.16331	63.6283
	KD24-aTcA	0.706907	0.843385	0.727316	KD24-aTc	0.626999	0.748049	0.6451			dacC	-1.33791	62.3488
	KD24+aTcA	0.0558002	0.072836	0.0707875	KD24+aTc	0.0494925	0.0646026	0.0627857			kdsB	-1.4007	62.2945
	cDNA/gDNA	Rep1	Rep2	Rep3	Average	STDev					CTL0540	1.15839	62.1588
	14-aTc	0.00653741	0.00850234	0.0106563	0.00856536	0.00206018					CTL0885	1.14413	61.5211
	14+aTc	0.0949993	0.111322	0.0935098	0.0999436	0.0098817					clpC	1.11611	61.163
	24-aTc	0.403308	0.535623	0.367119	0.43535	0.0887042					CTL0271	1.19134	60.924
	24+aTc	0.352388	0.433734	0.351596	0.37924	0.0471955					pgsA_2	-1.40045	59.2324
											CTL0576	-1.38844	56.1939
											ompB	1.08442	55.3477
		Efficiency									CTL0297	1.11043	54.3713
	glgA	91.7951			Efficiency apply						sctJ	1.07601	54.0907
		Rep1	Rep2	Rep3		Rep1	Rep2	Rep3			CTL0398	1.04797	53.8241
	KD14-aTcA	6.96444e-05	8.29224e-05	6.77695e-05	KD14-aTc	6.39301e-05	7.61186e-05	6.22091e-05			tktB	-1.0732	53.6095
	KD14+aTcA	0.00525502	0.00486866	0.00456502	KD14+aTc	0.00482385	0.00446918	0.00419046			CTL0638	1.18071	53.5928
	KD24-aTcA	0.31098	0.235257	0.270474	KD24-aTc	0.285464	0.215954	0.248282			CTL0301	1.10565	53.5019
	KD24+aTcA	0.00989928	0.00855561	0.00955445	KD24+aTc	0.00908704	0.00785362	0.0087705			CTL0765	-1.08082	52.1246
	cDNA/gDNA	Rep1	Rep2	Rep3	Average	STDev					CTL0865	-1.34176	51.9805
	14-aTc	0.00524769	0.00542122	0.00460803	0.00509232	0.000428284					CTL0610	1.27609	50.3312
	14+aTc	0.103103	0.0845992	0.0653353	0.0843457	0.018885					lplA_2	-1.37876	49.7462
	24-aTc	0.18362	0.154629	0.141294	0.159848	0.0216404					CTL0209	1.17878	49.4731
	24+aTc	0.0647001	0.0527283	0.0491143	0.0555142	0.0081578					CTL0823	1.22157	49.1776
											CTL0456	1.15474	48.306
											CTL0506	-1.17906	47.4658
											gltT	-1.01096	47.1292
	Fig 8C										CTL0219	1.97593	46.6949
	ahpC KD-aTc										CTL0337	1.27873	45.6932
		Rep 1	Rep 2	Rep 3	Average	STDev					CTL0061	-0.966824	43.7058
	16 hpi	661.467	871.2	790.533	774.4	105.793					groES	1.53215	43.5794
	18 hpi	3613.87	5098.13	4065.6	4259.2	760.837					mip	0.989399	43.4261
	20 hpi	9744.53	17746.7	11357.9	12949.7	4231.9					plsX	-1.12966	42.9172
	22 hpi	149717	265232	171013	195321	61474					sfhB	-1.14196	42.1824
	24 hpi	942187	1.86501e+06	1.01317e+06	1.27346e+06	513530					CTL0026	-1.27178	41.7168
											CTL0080	0.960488	40.6732
	ahpC KD+aTc	Rep 1	Rep 2	Rep 3							rplL	0.931315	40.1989
	16 hpi	1452	1887.6	1581.07	1640.22	223.744					CTL0338A	1.79299	39.4394
	18 hpi	27749.3	39300.8	28588.3	31879.5	6440.74					CTL0095	-1.10815	38.8072
	20 hpi	24909.9	43495.5	26458.7	31621.3	10312.4					ltuB	1.08009	38.7969
	22 hpi	22780.3	39688	24264.5	28910.9	9362.67					amn	-1.04718	37.3966
	24 hpi	22586.7	43882.7	27749.3	31406.2	11109					CTL0525	0.957351	37.3737
											CTL0339	0.920253	37.1506
											CTL0132	1.07654	36.8793
											CTL0071	0.870093	36.49
											CTL0397	0.858547	36.1493
											rplY	-0.881055	35.3376
											pmpE	0.855343	35.3071
											hctA	0.852034	35.1019
											trxA	-1.0055	34.9397
											CTL0882	-0.91614	34.9203
											CTL0675	-1.16291	34.2633
											topA	-0.842332	33.7619
											CTL0305	0.827306	33.2487
											sohB	0.874475	33.105
											def	-0.995451	32.9366
											CTL0473	-0.940152	32.8217
											CTL0603	-0.9766	32.7817
											trpS	0.878013	32.5788
											gyrA2	-0.903678	32.0857
											CTL0321	0.811929	31.9547
											CTL0152	0.799065	31.8843
											ruvA	-1.0137	31.8459
											pal	0.912038	31.4173
											nqrB	0.836048	31.2461
											CTL0802	-0.977103	31.0714
											CTL0529	-1.39419	30.9748
											dsbA	0.932903	30.8649
											cdsA	0.968141	30.6974
